# Supplementary material
Source: PubMed Central journal article supplement (PMC4718409)
Supplement: EMBR-17-064-s001.pdf [file EMBR-17-064-s001.pdf]

## **Table of Contents**

Appendix Hki wtg"Legends

Appendix Table Legends

Appendix Figures S1-S5

Appendix Tables S1-S2

## Appendix Figure Legends

**Appendix Figure S1.** Effect of USP9X over-expression on YAP target genes.

A. Densely cultured stable RPE clones integrated with empty vector (Vec), USP9X-V5 WT or CS were analyzed by Western blotting for the indicated proteins.

B. Densely cultured RPE cells transduced with USP9X CRISPR-SAM were analyzed by Western blotting for the indicated proteins.

C. USP9X siRNA transfected CRISPR-SAM transduced cells were analyzed by Western blotting for the indicated proteins.

**Appendix Figure S2.** MST1/2 does not mediate the effect of USP9X depletion.

A. Control or USP9X shRNA-expressing RPE cells were transfected with the indicated siRNAs and re-seeded to the sparse density. Cell extracts were analyzed by Western blotting for the indicated proteins.

B. The cells described in (A) were analyzed by RT-qPCR for the indicated target genes (n=3). Error bars indicate the S.E.M. (\*p < 0.05, \*\*p < 0.01, \*\*\*p < 0.001; paired Student's t-test).

**Appendix Figure S3.** USP9X de-ubiquitinates AMOTL2 *in vitro*.

WT or catalytically inactive (CS) USP9X-V5 were immunoprecipitated with an anti-V5 antibody and incubated with ubiquitinated AMOTL2 CC (coiled-coil domain). Samples were fractionated by SDS-PAGE and analyzed by Western blotting for the indicated proteins. Myc (Ub-AMOTL2) refers to ubiquitinated full-length AMOTL2 CC and thus reduces by USP9X. Myc (Free Ub) refers to Ub monomer and thus appears by USP9X.

**Appendix Figure S4.** Both WT and K0 Ub activate LATS2.

293T cells were transfected as indicated and immunoprecipitated with an anti-Myc antibody .

LATS2 immune complexes were subjected to a kinase assay with His-YAP and cold ATP.

**Appendix Figure S5.** Evolutionarily conserved LATS2 target sequence in USP9X.

The amino acid sequences of USP9X in the indicated species were aligned. Red colored S/T residues correspond to the predicted target site. The amino acid number of the predicted target site in human USP9X is indicated (1019).

### **Appendix Table Legends**

**Appendix Table S1.** Proteins that interact with SBP-YAP in RPE cells, as identified by mass spectrometry.

**Appendix Table S2.** List of primers and siRNA/shRNA/sgRNA sequences used in this study.

Figure S1

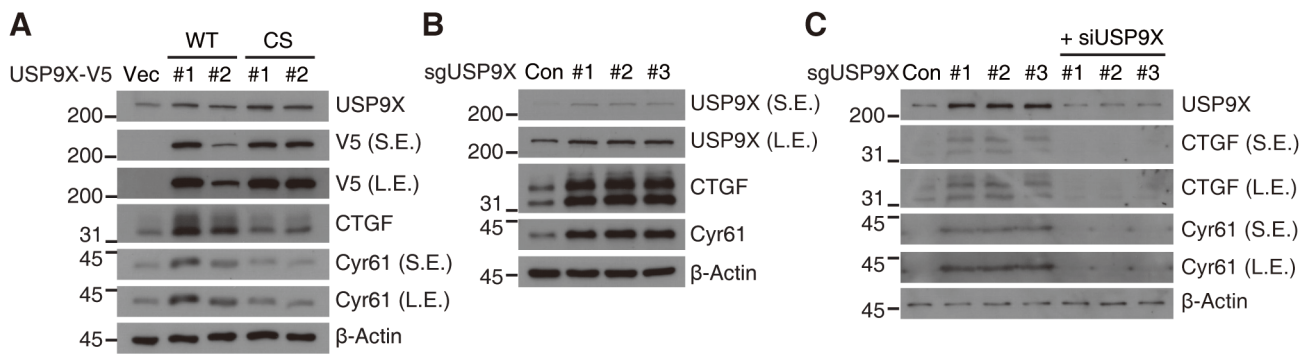

Figure S2

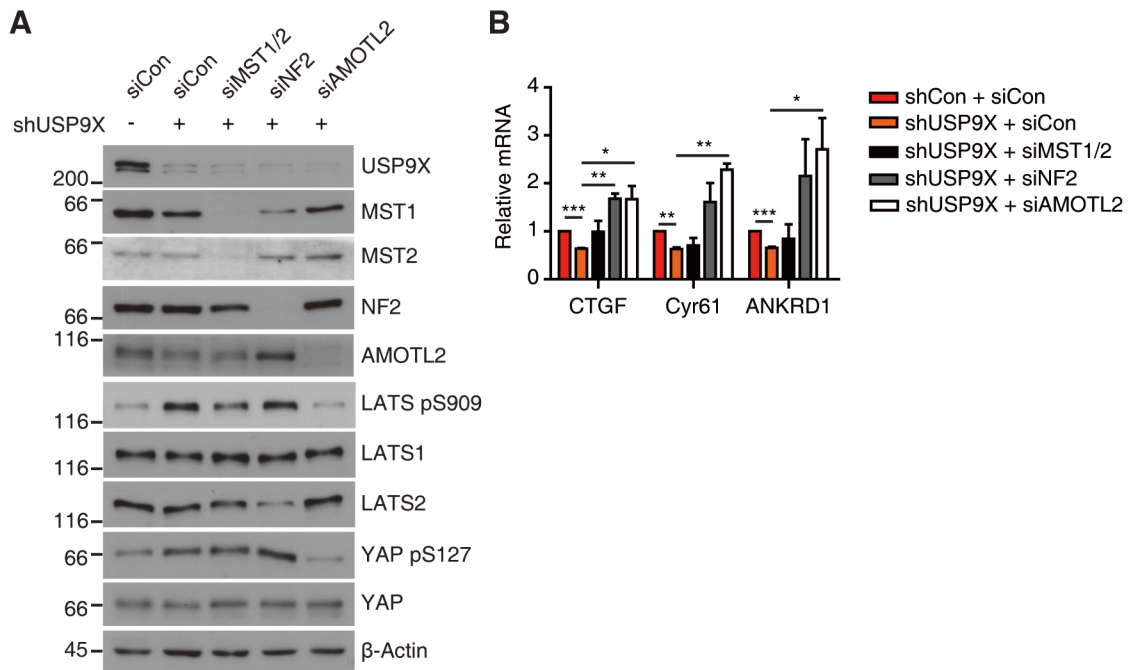

Figure S3

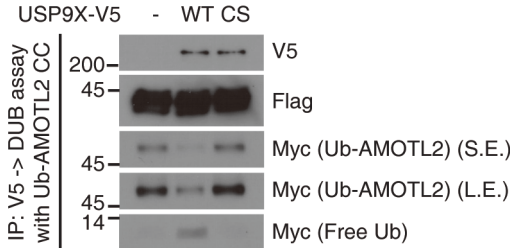

Figure S4

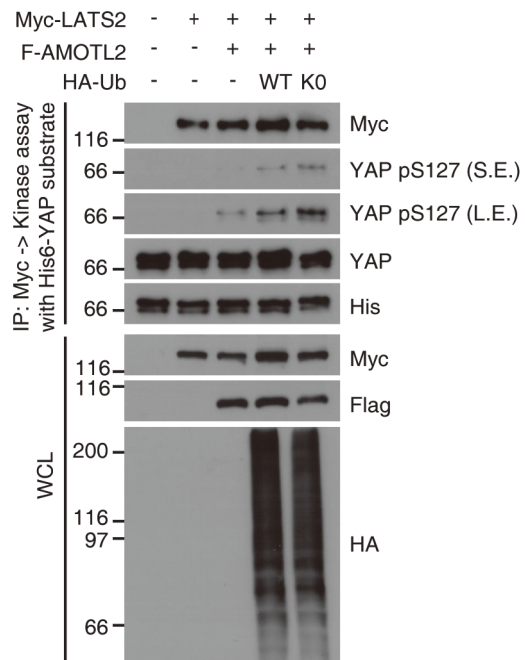

Figure S5

|                   | 1019                    |
|-------------------|-------------------------|
| Homo sapiens      | M S L H P R Y I S F L W |
| Mus musculus      | M S L H P R Y I S F L W |
| Rattus norvegicus | M S L H P R Y I S F L W |
| Canis lupus       | M S L H P R Y I S F L W |
| Gallus gallus     | M S L H P R Y I S F L W |
| Danio Rerio       | M S L H V R Y I S F L W |
| Drosophila        | I S Q N Y Q Y T E F F L |
| LATS consensus    | H x R x x S/T           |



| Gene name | Score   | Coverage | # Unique Peptides | # Peptides | # PSMs |
|-----------|---------|----------|-------------------|------------|--------|
| YWHAE     | 3827.06 | 81.57%   | 32                | 34         | 1385   |
| YWHAQ     | 2295.51 | 83.27%   | 27                | 31         | 841    |
| YWHAZ     | 1842.09 | 80.82%   | 23                | 29         | 709    |
| YWHAG     | 1321.28 | 96.76%   | 19                | 28         | 529    |
| WBP2      | 1135.25 | 65.76%   | 18                | 18         | 407    |
| MPDZ      | 1073.63 | 57.44%   | 91                | 93         | 366    |
| YWHAB     | 889.45  | 78.28%   | 13                | 22         | 385    |
| YWHAH     | 879.57  | 73.98%   | 19                | 26         | 357    |
| TUBB      | 537.03  | 53.99%   | 5                 | 24         | 190    |
| TUBB4B    | 514.62  | 55.96%   | 2                 | 26         | 186    |
| TUBB2A    | 470.55  | 47.42%   | 2                 | 22         | 172    |
| DSP       | 399.3   | 23.72%   | 63                | 63         | 147    |
| TUBB4A    | 392.55  | 46.85%   | 1                 | 19         | 138    |
| TEAD1     | 388.26  | 36.85%   | 10                | 21         | 134    |
| PPP1CA    | 348.11  | 65.76%   | 9                 | 23         | 124    |
| TUBA1B    | 346.55  | 65.19%   | 3                 | 26         | 123    |
| TUBA1C    | 327.69  | 65.48%   | 3                 | 26         | 119    |
| LIN7C     | 283.76  | 73.60%   | 18                | 18         | 130    |
| TUBB3     | 278.93  | 36.89%   | 3                 | 18         | 97     |
| TUBB8     | 243.15  | 24.55%   | 2                 | 11         | 89     |
| PPP1CB    | 240.4   | 42.81%   | 2                 | 16         | 88     |
| TUBB6     | 234.99  | 50.00%   | 9                 | 20         | 85     |
| ACTB      | 187.05  | 53.60%   | 17                | 17         | 74     |
| TEAD4     | 184.1   | 38.71%   | 8                 | 18         | 71     |
| TEAD3     | 147.54  | 26.21%   | 3                 | 14         | 61     |
| DSG1      | 133.92  | 24.02%   | 16                | 16         | 48     |
| ANXA2     | 128.61  | 51.33%   | 17                | 17         | 34     |
| PRDX1     | 123.85  | 45.23%   | 15                | 15         | 63     |
| PTPN14    | 113.33  | 20.64%   | 20                | 20         | 47     |
| CIT       | 107.72  | 14.31%   | 25                | 25         | 45     |
| SLC25A6   | 104.96  | 40.94%   | 6                 | 11         | 46     |
| FBXW11    | 100.62  | 35.43%   | 17                | 17         | 38     |
| FHL2      | 95.01   | 50.18%   | 13                | 13         | 37     |
| PDLIM7    | 80.97   | 40.92%   | 17                | 17         | 37     |
| RASSF8    | 77.76   | 51.31%   | 20                | 20         | 33     |
| DUSP14    | 77.14   | 41.92%   | 5                 | 5          | 20     |
| SMAD3     | 60.51   | 26.77%   | 9                 | 9          | 22     |
| CAPNS1    | 57.68   | 41.04%   | 7                 | 7          | 20     |

|           |       |        |    |    |    |
|-----------|-------|--------|----|----|----|
| CCDC85C   | 53.45 | 39.38% | 14 | 14 | 24 |
| SLC25A5   | 53.19 | 30.20% | 5  | 10 | 27 |
| MPP5      | 49.41 | 17.47% | 11 | 11 | 20 |
| CSNK1E    | 41.88 | 18.75% | 6  | 6  | 15 |
| SLC25A3   | 40.59 | 22.53% | 6  | 6  | 15 |
| PPP2R2A   | 39.2  | 23.27% | 7  | 7  | 14 |
| ARG1      | 37.56 | 31.99% | 8  | 8  | 14 |
| ATP5A1    | 36.6  | 18.09% | 7  | 7  | 13 |
| USP9X     | 35.93 | 4.42%  | 10 | 10 | 15 |
| SERPINB12 | 33.34 | 20.49% | 7  | 7  | 12 |
| SLC25A11  | 32.56 | 27.76% | 5  | 5  | 12 |
| EEF1A1    | 32.28 | 27.06% | 7  | 7  | 10 |
| SKP1      | 32.19 | 48.47% | 5  | 5  | 11 |
| HSPA8     | 28.73 | 52.94% | 6  | 7  | 13 |
| PAICS     | 28.41 | 28.24% | 10 | 10 | 14 |
| TRIP6     | 28.04 | 19.12% | 7  | 7  | 12 |
| SLC25A10  | 25.31 | 26.64% | 4  | 4  | 8  |
| LRRC15    | 25.02 | 2.75%  | 2  | 2  | 9  |
| FASN      | 24.83 | 2.43%  | 5  | 5  | 8  |
| HSD17B12  | 24.62 | 24.68% | 6  | 6  | 10 |
| PKP1      | 22.34 | 9.92%  | 7  | 7  | 10 |
| GAPDH     | 21.06 | 23.08% | 4  | 4  | 8  |
| SLC25A5   | 20.82 | 21.14% | 2  | 6  | 8  |
| MYH9      | 20.23 | 3.83%  | 7  | 7  | 9  |
| SLC25A22  | 19.46 | 28.30% | 3  | 3  | 8  |
| RPS3      | 19.1  | 41.03% | 4  | 4  | 7  |
| DSG4      | 18.86 | 5.10%  | 4  | 4  | 6  |
| SLC25A1   | 18.65 | 13.83% | 4  | 4  | 9  |
| CDSN      | 18.17 | 6.43%  | 3  | 3  | 6  |
| DSC1      | 17.89 | 6.67%  | 4  | 4  | 6  |
| UBC       | 17.7  | 45.64% | 3  | 3  | 7  |
| PRPSAP1   | 16.87 | 24.04% | 2  | 2  | 6  |
| PKP1      | 16.67 | 6.20%  | 4  | 4  | 6  |
| SLC9A3R2  | 16.13 | 18.71% | 6  | 6  | 8  |
| WWC3      | 16.09 | 1.83%  | 2  | 2  | 6  |
| SAPCD2    | 15.98 | 19.04% | 6  | 6  | 7  |
| FLG2      | 15.23 | 3.85%  | 4  | 4  | 6  |
| ANXA11    | 15.07 | 15.89% | 6  | 6  | 6  |
| HIST1H1C  | 15.07 | 10.80% | 2  | 2  | 5  |
| TMEM33    | 14.59 | 18.62% | 5  | 5  | 6  |

|          |       |        |   |   |   |
|----------|-------|--------|---|---|---|
| TJP1     | 14.51 | 3.60%  | 5 | 5 | 6 |
| VDAC2    | 14.5  | 16.86% | 4 | 4 | 6 |
| HSPA6    | 13.19 | 6.22%  | 2 | 3 | 5 |
| VPS26A   | 12.57 | 13.87% | 3 | 3 | 5 |
| SELENBP1 | 12.5  | 6.78%  | 3 | 3 | 5 |
| HNRNPH1  | 12.07 | 13.99% | 4 | 4 | 5 |
| UQCRC2   | 11.36 | 16.26% | 5 | 5 | 6 |
| PRKDC    | 11.18 | 1.39%  | 4 | 4 | 4 |
| PYCRL    | 10.97 | 8.43%  | 2 | 2 | 4 |
| GSR      | 10.86 | 13.95% | 3 | 3 | 5 |
| PCBP2    | 10.71 | 25.00% | 3 | 3 | 5 |
| ALB      | 10.51 | 3.60%  | 2 | 2 | 4 |
| DPM1     | 10.37 | 10.59% | 2 | 2 | 5 |

**Appendix Table S1.** Proteins that interact with SBP-YAP in RPE cells, as identified by mass spectrometry.

| <b>siRNA</b>   |                             |                                   |
|----------------|-----------------------------|-----------------------------------|
| <b>Gene</b>    | <b>Target sequence</b>      |                                   |
| Control (GL2)  | CGT ACG CGG AAT ACT TCG A   |                                   |
| USP9X #1       | GAG AGT TTA TTC ACT GTC TTA |                                   |
| USP9X #2       | CGC CTG ATT CTT CCA ATG AAA |                                   |
| MST1           | GGG CAC TGT CCG AGT AGC AGC |                                   |
| MST2           | CGG TCA AGT TGT CGC AAT T   |                                   |
| SAV1           | GCA CAT GAA GAC TAC AGA TAT |                                   |
| NF2            | GAG GAA GCA ACC CAA GAC GTT |                                   |
| AMOTL2         | GAA CAA GAT GGA CAG TGA AAT |                                   |
| LATS1          | GTC TGC TTC ATA CAT TCC TAA |                                   |
| LATS2          | AAA GGC GTA TGG CGA GTA G   |                                   |
| <b>shRNA</b>   |                             |                                   |
| <b>Gene</b>    | <b>Target sequence</b>      |                                   |
| Control (GFP)  | CAA CAA GAT GAA GAG CAC CAA |                                   |
| USP9X          | CGC CTG ATT CTT CCA ATG AAA |                                   |
| AMOTL2         | GAA CAA GAT GGA CAG TGA AAT |                                   |
| <b>sgRNA</b>   |                             |                                   |
| <b>Gene</b>    | <b>Target sequence</b>      |                                   |
| Control (CAG)  | GTT CCG CGT TAC ATA ACT TA  |                                   |
| USP9X #1       | AGG ACG GGC ATC CGC GGC TG  |                                   |
| USP9X #2       | AGG CGC GAC AGA GGC CCT GA  |                                   |
| USP9X #3       | GGC CGG GTG CGG AGA GGT TG  |                                   |
| <b>qRT PCR</b> |                             |                                   |
| <b>Gene</b>    | <b>Forward sequence</b>     | <b>Reverse sequence</b>           |
| $\beta$ -Actin | CAT GTA CGT TGC TAT CCA GGC | CTC CTT AAT GTC ACG CAC GAT       |
| CTGF           | CCA ATG ACA ACG CCT CCT G   | TGG TGC AGC CAG AAA GCT C         |
| Cyr61          | GGT CAA AGT TAC CGG GCA GT  | GGA GGC ATC GAA TCC CAG C         |
| ANKRD1         | CAC TTC TAG CCC ACC CTG TGA | CCA CAG GTT CCG TAA TGA TTT       |
| E-cadherin     | CGA GAG CTA CAC GTT CAC GG  | GGG TGT CGA GGG AAA AAT AGG       |
| N-cadherin     | TCA GGC GTC TGT AGA GGC TT  | ATG CAC ATC CTT CGA TAA GAC<br>TG |
| Vimentin       | AGT CCA CTG AGT ACC GGA GAC | CAT TTC ACG CAT CTG GCG TTC       |
| Fibronectin    | CGG TGG CTG TCA GTC AAA G   | AAA CCT CGG CTT CCT CCA TAA       |
| Col8a1         | AAA GGG GAA ATT GGG CCT ATG | CTG GTT GCC CTG GTA ACC C         |

**Appendix Table S2.** List of primers and siRNA/shRNA/sgRNA sequences used in this study.
