# Supplementary material
Source: PubMed Central journal article supplement (PMC4718409)
Supplement: EMBR-17-064-s002.pdf [file EMBR-17-064-s002.pdf]

## Expanded View Figures

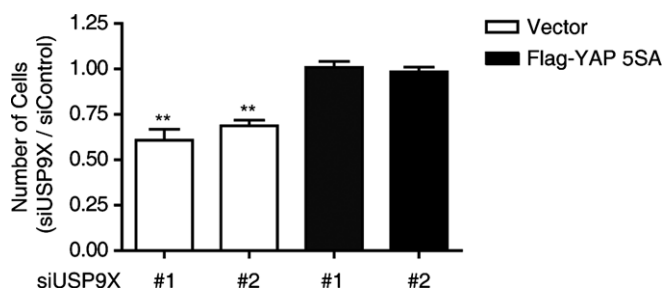

**Figure EV1. USP9X knockdown impairs cell proliferation in a YAP-dependent manner.**

RPE cells were transduced with vector (control) or Flag-YAP 5SA retroviruses, and then transfected with control or USP9X-targeting siRNAs. Cells were quantified three days after siRNA transfection and normalized with respect to control siRNA-transfected cells. USP9X knockdown impaired cell proliferation in control cells, but not in Flag-YAP 5SA-expressing cells ( $n = 4$ ). Error bars indicate the SEM (compared with siControl cells; \*\* $P < 0.01$ , paired Student's  $t$ -test).

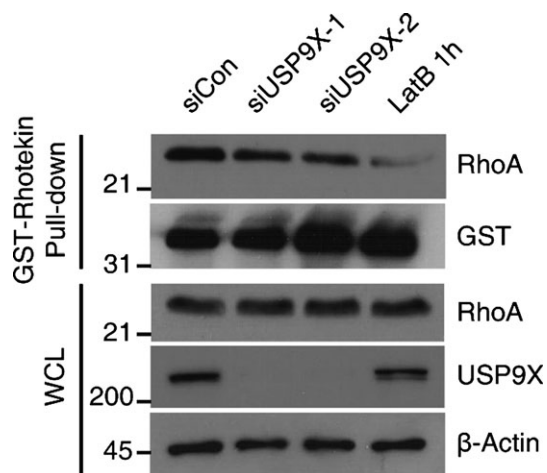

**Figure EV2. RhoA activity is not affected by USP9X depletion.**

Sparsely cultured RPE cells were transfected with the indicated siRNAs, harvested, lysed and incubated with 5  $\mu$ g of GST-Rhotekin pre-bound to 20  $\mu$ l of GST beads. After incubation for 1 h at 4°C, the beads were collected and the bound proteins were analyzed by Western blotting.

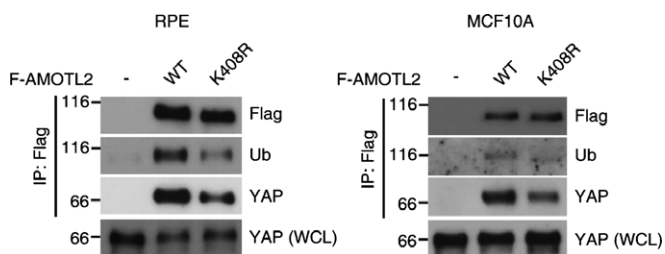

**Figure EV3. Analysis of the AMOTL2 K408R mutant.**

RPE or MCF10A cells were transduced with Flag-AMOTL2 WT or the K408R mutant and immunoprecipitated with an anti-Flag antibody. Immunoprecipitated and WCL samples were analyzed by Western blotting for the indicated proteins.

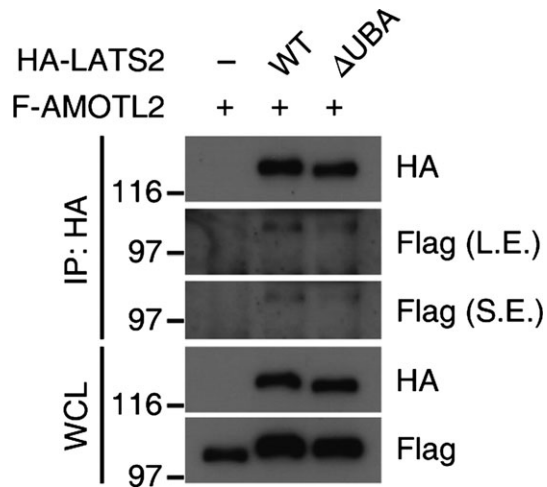

**Figure EV4. Interaction between full-length AMOTL2 and LATS2 WT or ΔUBA mutant.**  
293T cells were transfected with the indicated combinations of DNAs and subjected to co-immunoprecipitation.

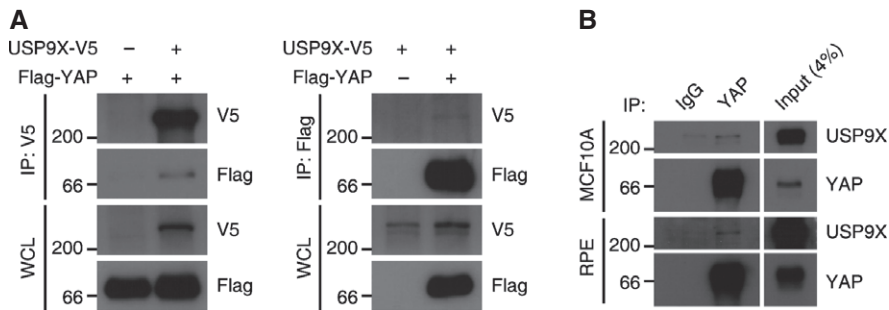

**Figure EV5. Interaction between USP9X and YAP.**

**A** 293T cells were transfected with the indicated combinations of DNAs and subjected to co-immunoprecipitation with the indicated antibodies.  
**B** Densely cultured RPE or MCF10A cells were lysed and subjected to co-immunoprecipitation with the indicated antibodies.
